# Supplementary material for: Expression of the microRNA-200 Family, microRNA-205, and Markers of Epithelial–Mesenchymal Transition as Predictors for Endoscopic Submucosal Dissection over Esophagectomy in Esophageal Adenocarcinoma: A Single-Center Experience
Source: Cells. 2020 Feb 20;9(2):486. doi: 10.3390/cells9020486 (PMC7072807; doi:10.3390/cells9020486)
Supplement: Supplementary file 1 [file cells-09-00486-s001.pdf]

## Supplementary Information

**Supplementary Table 1. Extended patient characteristics.**

| ID                                | L | V | Pn | R-<br>Status | Tumor content<br>(min-max, %) <sup>b</sup> |
|-----------------------------------|---|---|----|--------------|--------------------------------------------|
| <b>endoscopic resection (ESD)</b> |   |   |    |              |                                            |
| E1                                | 0 | 0 | 0  | 0            | 5-10%                                      |
| E2                                | 0 | 0 | 0  | 0            | 10-15%                                     |
| E3                                | 0 | 0 | 0  | 0            | 15-20%                                     |
| E4                                | 0 | 0 | 0  | 0            | 5-10%                                      |
| E5                                | 0 | 0 | 0  | 0            | 40-50%                                     |
| E6                                | 0 | 0 | 0  | 0            | 10-15%                                     |
| E7                                | 0 | 0 | 0  | 0            | 50-60%                                     |
| E8                                | 0 | 0 | 0  | 0            | 5-10%                                      |
| E9                                | 0 | 0 | 0  | 0            | 20-30%                                     |
| E10                               | 0 | 0 | 0  | 0            | 5-10%                                      |
| <b>endoscopic resection (ESD)</b> |   |   |    |              |                                            |
| R1                                | 1 | 0 | 1  | 1            | 60-70%                                     |
| R2                                | 1 | 1 | 0  | 1            | 20-30%                                     |
| R3                                | 1 | 1 | 0  | 0            | 30-40%                                     |
| R4                                | 1 | 0 | 0  | 1            | 30-40%                                     |
| R5                                | 1 | 0 | 0  | 0            | 10-20%                                     |
| R6                                | 1 | 0 | 0  | 0            | 30-40%                                     |
| R7                                | 1 | 0 | 1  | 1            | 80-90%                                     |
| R8                                | 1 | 0 | 1  | 0            | 80-90%                                     |
| R9                                | 1 | 0 | 0  | 0            | 5-10%                                      |
| R10                               | 1 | 1 | 1  | 0            | 50-60%                                     |

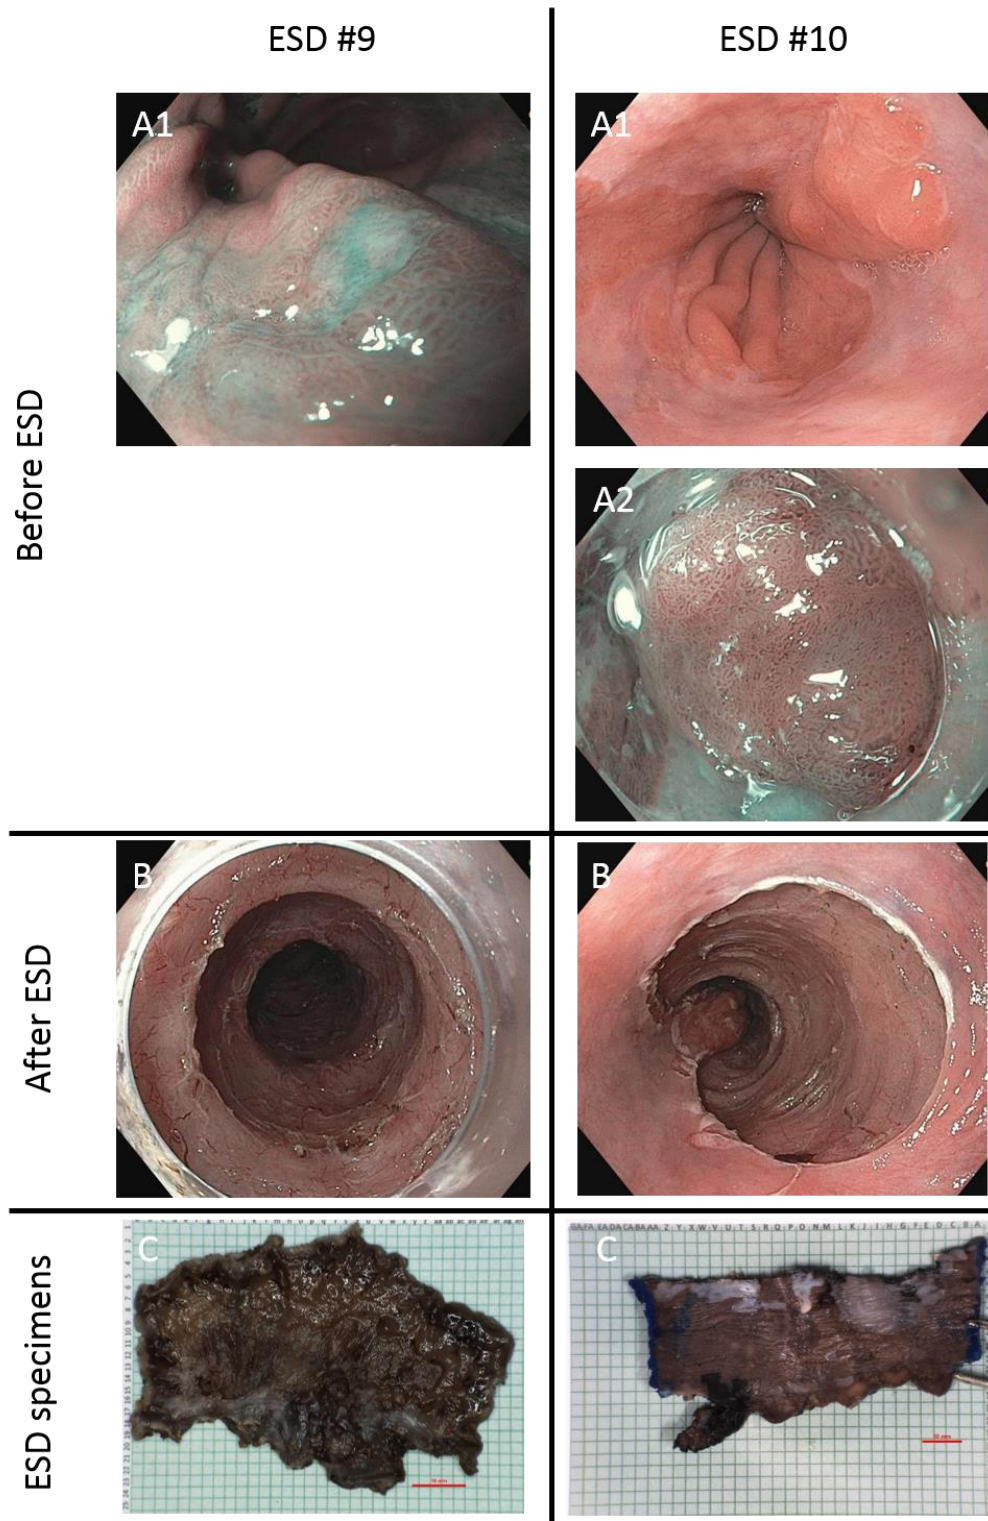

**Supplementary Figure 1. Exemplary images of typical endoscopic aspects of esophageal adenocarcinoma before and after endoscopic submucosal dissection (ESD, A and B) and corresponding ESD specimens (C).** Shown are images of the immunohistochemical and molecular investigated ESD-cases #9 and #10 (E9 and E10). The additional applied narrow band imaging with near-focus mode (#9-A1 and #10-A2) highlight the irregular mucosal and pit pattern of the early esophageal adenocarcinoma. The post-ESD images indicate the extension (in ESD-case #10 with complete circumferential due to extensive Barrett's mucosa) and clear margins of the endoscopic resected tumor specimens.
